# Supplementary figures and images for: Epidermal growth factor prevents APOE4-induced cognitive and cerebrovascular deficits in female mice
Source: PubMed Central journal article supplement — Heliyon. 2017 Jun 7;3(6):e00319. doi: 10.1016/j.heliyon.2017.e00319 (PMC5463012; doi:10.1016/j.heliyon.2017.e00319), 2017-06-07

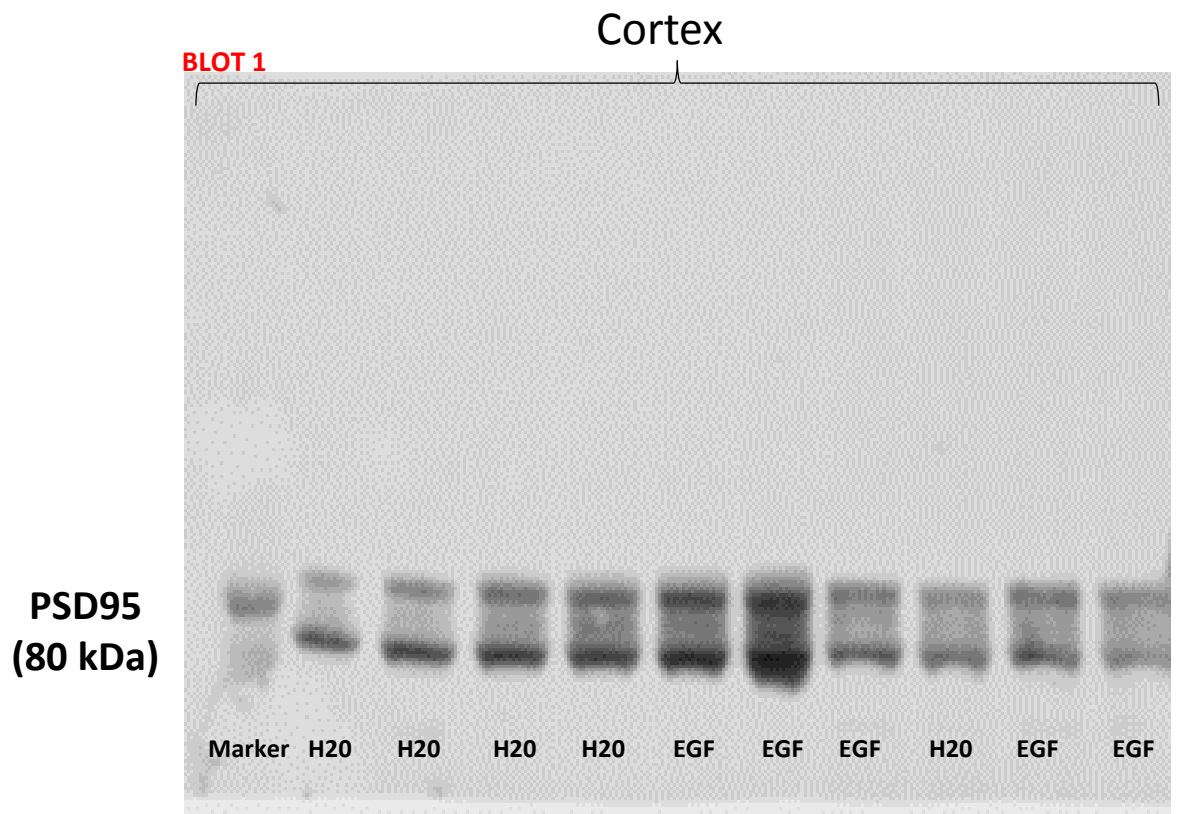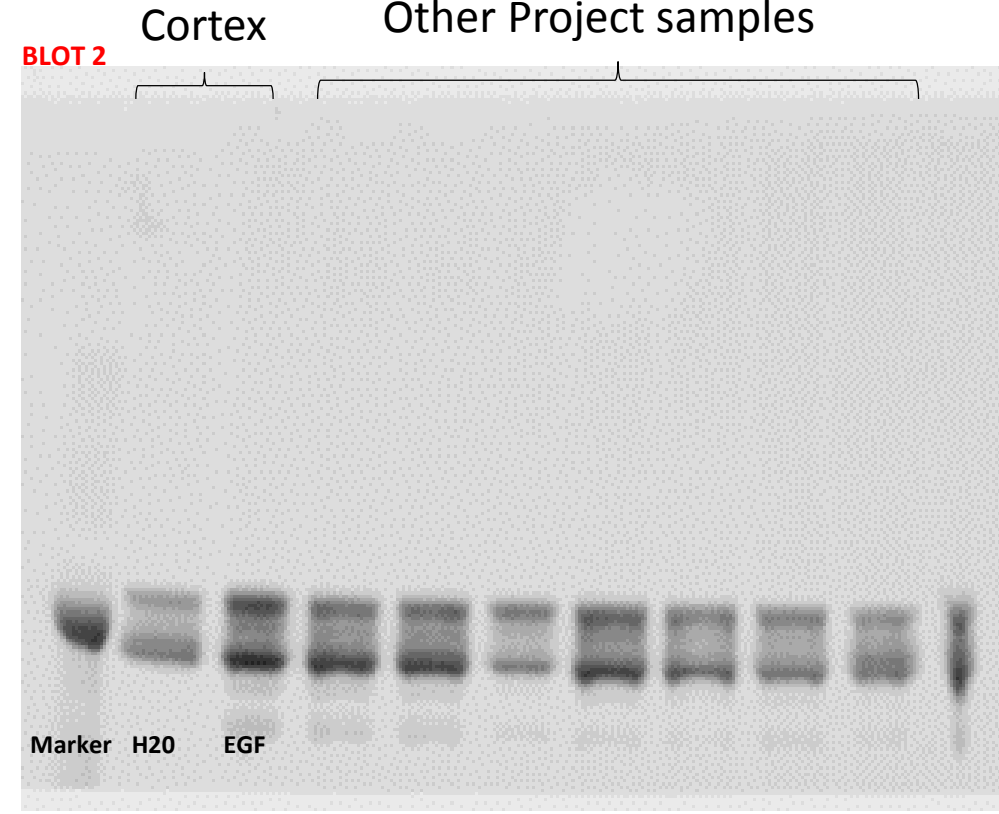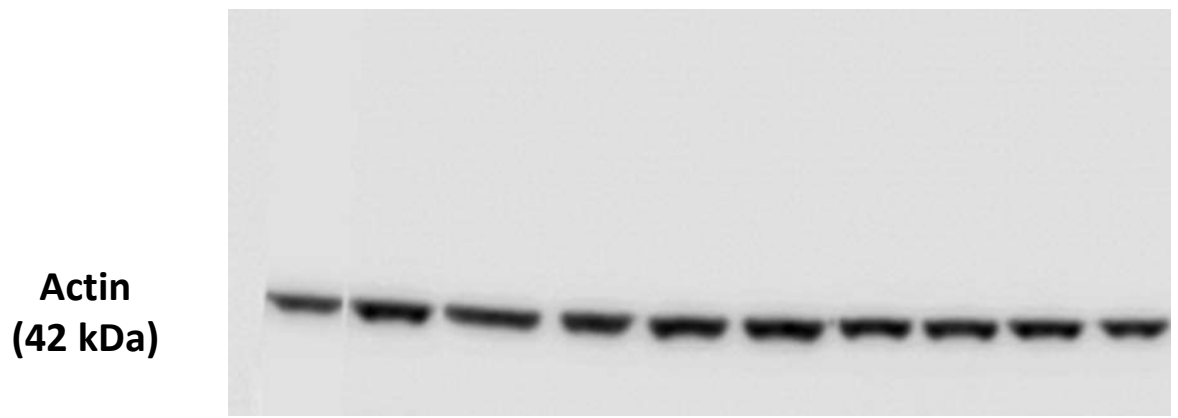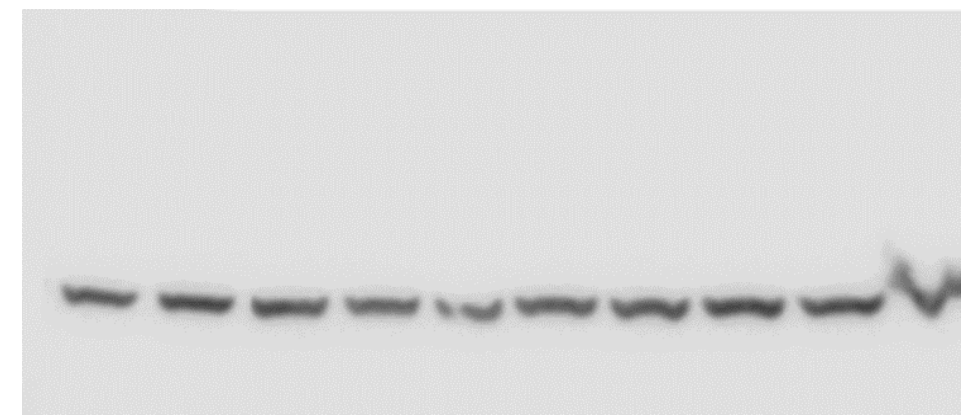

Supplement: mmc1.pdf [file mmc1.pdf]
